# Supplementary material for: Elucidating the Evolutionary Relationships among Bos taurus Digestive Organs Using Unigene Expression Data
Source: PubMed Central journal article supplement (PMC3042666; doi:10.4061/2009/803142), 2010-02-08
Supplement: 803142.f1.pdf [file 803142.f1.pdf]

| Compartment                      | Number of Expressed Entries | Percentage of Total Entries | Number of Expressed Entries with <i>H. sapiens</i> Sequence Similarity Scores of 95% or Higher | Percentage of Total Entries |
|----------------------------------|-----------------------------|-----------------------------|------------------------------------------------------------------------------------------------|-----------------------------|
| <b>Digestive Organs</b>          |                             |                             |                                                                                                |                             |
| Abomasum                         | 1175                        | 2.664                       | 182                                                                                            | 0.413                       |
| Omasum                           | 112                         | 0.254                       | 25                                                                                             | 0.057                       |
| Reticulum                        | 504                         | 1.143                       | 69                                                                                             | 0.156                       |
| Rumen                            | 1030                        | 2.335                       | 183                                                                                            | 0.415                       |
| Intestine                        | 5190                        | 11.767                      | 1262                                                                                           | 2.861                       |
| Abomasum – Omasum                | 40                          | 0.091                       | 11                                                                                             | 0.025                       |
| Abomasum – Reticulum             | 96                          | 0.218                       | 21                                                                                             | 0.048                       |
| Abomasum – Rumen                 | 167                         | 0.379                       | 57                                                                                             | 0.129                       |
| Abomasum – Intestine             | 1865                        | 4.228                       | 667                                                                                            | 1.512                       |
| Omasum – Reticulum               | 9                           | 0.02                        | 2                                                                                              | 0.005                       |
| Omasum – Rumen                   | 55                          | 0.125                       | 18                                                                                             | 0.041                       |
| Omasum – Intestine               | 127                         | 0.288                       | 48                                                                                             | 0.109                       |
| Reticulum – Rumen                | 123                         | 0.279                       | 31                                                                                             | 0.07                        |
| Reticulum – Intestine            | 518                         | 1.174                       | 172                                                                                            | 0.39                        |
| Rumen – Intestine                | 1013                        | 2.297                       | 442                                                                                            | 1.002                       |
| Abomasum – Omasum – Reticulum    | 7                           | 0.016                       | 2                                                                                              | 0.005                       |
| Abomasum – Omasum – Rumen        | 17                          | 0.039                       | 6                                                                                              | 0.014                       |
| Abomasum – Omasum – Intestine    | 134                         | 0.304                       | 61                                                                                             | 0.138                       |
| Abomasum – Reticulum – Rumen     | 56                          | 0.127                       | 25                                                                                             | 0.057                       |
| Abomasum – Reticulum – Intestine | 435                         | 0.986                       | 193                                                                                            | 0.438                       |
| Abomasum – Rumen – Intestine     | 987                         | 2.238                       | 506                                                                                            | 1.147                       |
| Omasum – Reticulum – Rumen       | 30                          | 0.068                       | 2                                                                                              | 0.005                       |

|                                           |      |        |      |       |
|-------------------------------------------|------|--------|------|-------|
| Omasum – Reticulum – Intestine            | 26   | 0.059  | 14   | 0.032 |
| Omasum – Rumen – Intestine                | 76   | 0.172  | 36   | 0.082 |
| Reticulum – Rumen – Intestine             | 356  | 0.807  | 180  | 0.408 |
| Abomasum – Omasum – Reticulum – Rumen     | 15   | 0.034  | 3    | 0.007 |
| Abomasum – Omasum – Reticulum – Intestine | 55   | 0.125  | 32   | 0.073 |
| Abomasum – Omasum – Rumen – Intestine     | 149  | 0.338  | 90   | 0.204 |
| Abomasum – Reticulum – Rumen – Intestine  | 843  | 1.911  | 530  | 1.201 |
| Omasum – Rumen – Reticulum – Intestine    | 83   | 0.188  | 51   | 0.116 |
| All Digestive Body Sites                  | 340  | 0.771  | 242  | 0.549 |
| <b>Control Tissues</b>                    |      |        |      |       |
| Blood                                     | 229  | 0.519  | 22   | 0.05  |
| Brain                                     | 9139 | 20.721 | 1498 | 3.396 |
| Muscle                                    | 1140 | 2.585  | 178  | 0.404 |
| Skin                                      | 1195 | 2.709  | 153  | 0.347 |
| Blood – Brain                             | 251  | 0.569  | 70   | 0.159 |
| Blood – Muscle                            | 28   | 0.063  | 6    | 0.014 |
| Blood – Skin                              | 39   | 0.088  | 7    | 0.016 |
| Brain – Muscle                            | 2426 | 5.5    | 862  | 1.954 |
| Brain – Skin                              | 2151 | 4.877  | 730  | 1.655 |
| Muscle – Skin                             | 349  | 0.791  | 89   | 0.202 |
| Blood – Brain – Skin                      | 212  | 0.481  | 94   | 0.213 |
| Blood – Brain – Muscle                    | 196  | 0.444  | 79   | 0.179 |
| Blood – Skin – Muscle                     | 18   | 0.041  | 5    | 0.011 |
| Brain – Skin – Muscle                     | 4366 | 9.899  | 2218 | 5.029 |
| All Control Tissues                       | 983  | 2.229  | 624  | 1.415 |
| <b>Control Organs</b>                     |      |        |      |       |
| Kidney                                    | 3120 | 7.074  | 682  | 1.546 |
| Liver                                     | 4751 | 10.772 | 388  | 0.88  |

|                            |      |       |      |       |
|----------------------------|------|-------|------|-------|
| Ovary                      | 2393 | 5.426 | 466  | 1.056 |
| Spleen                     | 722  | 1.637 | 124  | 0.281 |
| Kidney – Liver             | 1210 | 2.743 | 402  | 0.911 |
| Kidney – Ovary             | 1524 | 3.455 | 607  | 1.376 |
| Kidney – Spleen            | 265  | 0.6   | 86   | 0.195 |
| Liver – Ovary              | 953  | 2.161 | 310  | 0.703 |
| Liver – Spleen             | 189  | 0.429 | 56   | 0.127 |
| Ovary – Spleen             | 299  | 0.678 | 99   | 0.224 |
| Kidney – Liver –<br>Ovary  | 2346 | 5.319 | 1235 | 2.8   |
| Kidney – Liver<br>Spleen   | 233  | 0.528 | 97   | 0.22  |
| Kidney – Ovary -<br>Spleen | 469  | 1.063 | 219  | 0.497 |
| Liver – Ovary –<br>Spleen  | 271  | 0.614 | 94   | 0.213 |
| All Control Organs         | 1567 | 3.552 | 975  | 2.221 |
