# Supplementary material for: Elucidating the Evolutionary Relationships among Bos taurus Digestive Organs Using Unigene Expression Data
Source: PubMed Central journal article supplement (PMC3042666; doi:10.4061/2009/803142), 2010-02-08
Supplement: 803142.f2.pdf [file 803142.f2.pdf]

| <b>Body Site</b> | <b><i>Bos taurus</i></b> |         | <b><i>Homo sapiens</i></b> |         | <b><i>Mus musculus</i></b> |         |
|------------------|--------------------------|---------|----------------------------|---------|----------------------------|---------|
| Stomach          | N/A                      | N/A     | 61.7659                    | 133.826 | 98.1868                    | 229.103 |
| Abomasum         | 173.198                  | 346.395 | N/A                        | N/A     | N/A                        | N/A     |
| Omasum           | 453.104                  | 1359.31 | N/A                        | N/A     | N/A                        | N/A     |
| Reticulum        | 151.416                  | 302.831 | N/A                        | N/A     | N/A                        | N/A     |
| Rumen            | 91.1245                  | 250.592 | N/A                        | N/A     | N/A                        | N/A     |
| Intestine        | 79.0551                  | 173.921 | 38.2456                    | 93.4893 | 58.2262                    | 151.388 |
| Blood            | 471.198                  | 1178    | 56.397                     | 128.908 | 174.257                    | 290.428 |
| Brain            | 47.0541                  | 105.872 | 17.2068                    | 56.1486 | 35.8559                    | 90.6943 |
| Muscle           | 69.3217                  | 138.643 | 46.2317                    | 101.71  | 145.492                    | 254.61  |
| Skin             | 85.1837                  | 170.367 | 52.1584                    | 123.284 | 67.403                     | 143.231 |
| Kidney           | 65.3603                  | 169.937 | 37.6345                    | 84.6776 | 64.4766                    | 137.013 |
| Liver            | 69.5543                  | 156.497 | 38.4049                    | 91.2115 | 54.3021                    | 126.705 |
| Ovary            | 85.1046                  | 170.209 | 58.4533                    | 116.907 | 72.9514                    | 164.141 |
| Spleen           | 288.184                  | 504.323 | 73.996                     | 166.491 | 73.6548                    | 157.832 |
